# Supplementary material
Source: publisher site journal article supplement (https://www.dovepress.com/article/359459)
Supplement: Supplementary file 1 [file get_supplementary_file.php]

**Table S1 Back-translation,issues and agreements for each community’s self-efficacy scale**

| **Original** | **Back-translation1**  **(BT1)** | **Back-translation2**  **(BT2)** | **Issues** | **Agreement** |
| --- | --- | --- | --- | --- |
| Community’s self-efficacy scale | Community-related self-efficacy scale | Community life self-efficacy scale | Uncertainty how to translate into Chinese “community’s” | The most appropriate Chinese phase has been chosen. |
| Community network | Community part | Community | Chinese language has multiple meanings for the word “network”. | “Network” is the most adequate translation. |
| Neighborhood watch | Neighborhood relations | Neighborhood group | Lack of cultural equivalence | The Chinese version fits to the original version. |
| I can participate in the activities or volunteer work of my neighborhood association | I can take part in the activities of my neighborhood association | I can participate in the activities or volunteer work of my community | Uncertainty how to translate into Chinese “neighborhood association” | The most adequate Chinese phrase was chosen. |
| I can create an environment in which my neighbors can comfortably gather | I can create a comfortable gathering environment for my neighbors | I can create a comfortable environment in which my neighbors can gather | Discussion on whether to choose a better way of introducing | Chinese version is correct in terms of style. |
| I can encourage nearby neighbors to come out to gathering | I can encourage my neighbors to come out to gathering | I can encourage nearby neighbors to come out to gathering | Uncertainty whether the phrase “my neighbors” should be used in the Chinese version | The Chinese version is accord with the original version. |
| I can discuss my concerns about residents at neighborhood gatherings or community meetings held by local government | I can discuss my concerns about residents at community meetings held by local government | I can discuss my concerns about neighbors at community meetings held by local government | Discussion concerning the phrase “neighborhood gatherings” | The most correct Chinese version was chosen. |
| I can check in on elderly neighbors if I do not see them for a few days | I can visit elderly neighbors if I do not see them for a few days | If I have not seen my elderly neighbors for a few days, I can visit them | Discussion on a reasonable expression for this question | A reasonable expression in Chinese version was chosen. |
| I can help older neighbors with grocery shopping,garbage disposal, and other chores | I can help older neighbors with shopping and other housework | I can help older neighbors with grocery shopping and other housework | Uncertainty whether the phrase “garbage disposal” should be used in the Chinese version | The phrase “garbage disposal ”has been retained in the Chinese version |
| I can check in on neighborhood households where there are no signs of activity there | I can take the initiative to visit nearby residents without any sign of activity there | I can visit on neighborhood households where there are no signs of activity | Uncertainty the most suitable expression in the Chinese version | The Chinese version fits into the Chinese cultural background. |
| When I notice a person I do not know in the neighborhood, I can speak to them | I can talk with strange neighbors initiatively | I can notice and talk with strange neighbors initiatively | Discussion on whether to choose a simple way of introducing this question | The most adequate Chinese version was chosen. |
| Not confident at all | No confidence at all | No confidence | Discussion on whether the phrase “at all” should be added | The phrase “at all” was added. |
| Slightly unconfident | A little less confident | A less confident | More reasonable version in Chinese should be given | Chinese version is correct in terms of grammar. |
| Slightly confident | A little confident | Quite confident | The word “slightly” has multiple meanings in Chinese. | The most correct Chinese word has been chosen. |
| Completely confident | Completely confident | Completely confident | No objection | The Chinese version has been consistent in the original version. |
